# Supplementary material
Source: PubMed Central journal article supplement (PMC3224811)
Supplement: NIHMS329035-supplement-1_si_001.pdf [file NIHMS329035-supplement-1_si_001.pdf]

## Supporting Information

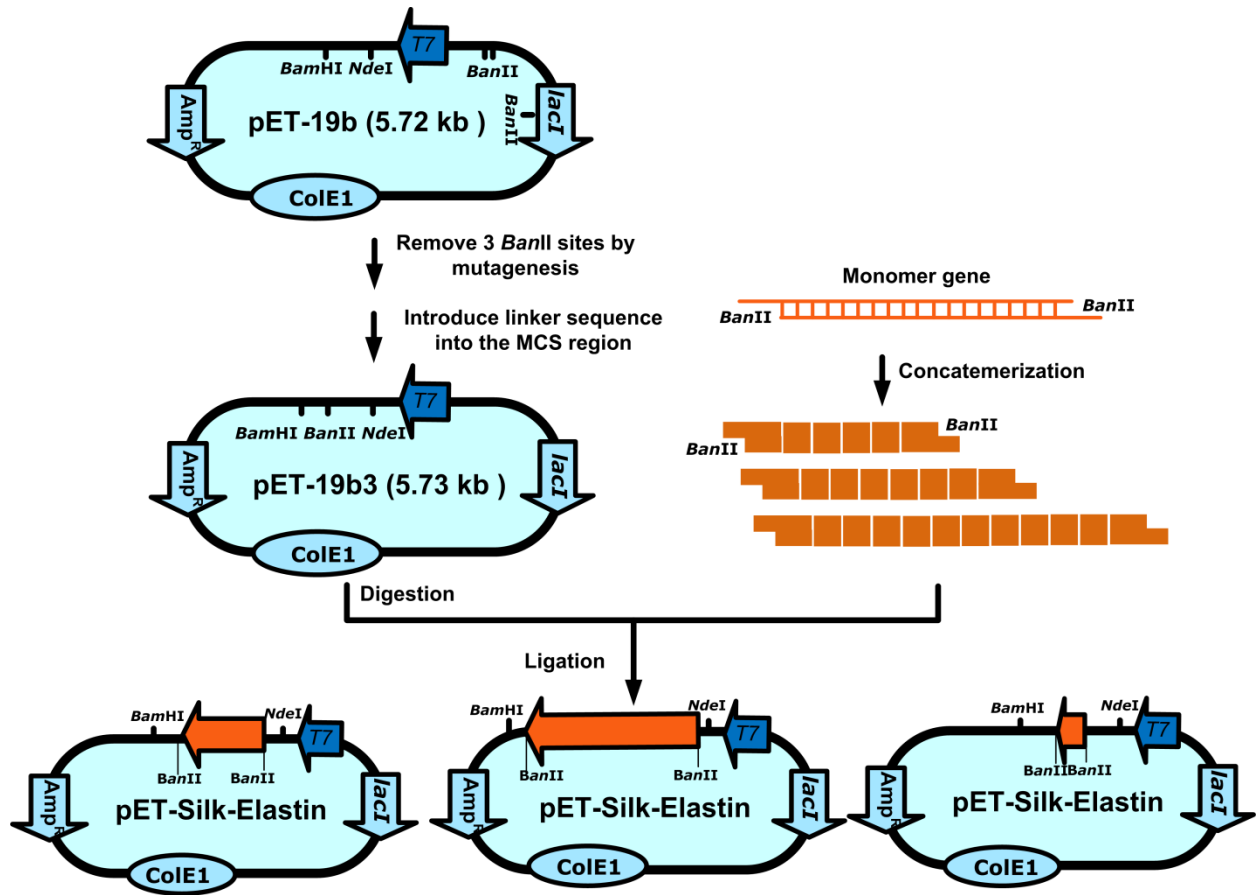

Figure S1. Construction of expression plasmids for recombinant silk elastin-like protein polymers. The monomer DNA sequences were designed and ordered from GenScript. Multimerization of the silk monomer is achieved through the “concatemerization” strategy relying on *BanII* restriction enzyme site.
